# Supplementary material for: Variability in individual particle structure and mixing states between the glacier–snowpack and atmosphere in the northeastern Tibetan Plateau
Source: Copernicus journal article supplement (doi:10.5194/tc-12-3877-2018), 2018-12-13
Supplement: Supplementary file 1 [file tc-12-3877-2018-supplement.pdf]

Supplement of The Cryosphere, 12, 3877–3890, 2018  
<https://doi.org/10.5194/tc-12-3877-2018-supplement>  
© Author(s) 2018. This work is distributed under  
the Creative Commons Attribution 4.0 License.

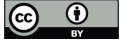

*Supplement of*

## **Variability in individual particle structure and mixing states between the glacier–snowpack and atmosphere in the northeastern Tibetan Plateau**

**Zhiwen Dong et al.**

*Correspondence to:* Zhiwen Dong ([dongzhiwen@lzb.ac.cn](mailto:dongzhiwen@lzb.ac.cn)) and Shichang Kang ([shichang.kang@lzb.ac.cn](mailto:shichang.kang@lzb.ac.cn))

The copyright of individual parts of the supplement might differ from the CC BY 4.0 License.

## Supplementary materials

**Table S1 Classification criteria of sampled particle types, mixing states and their possible sources in the snow/atmosphere samples**

| Particle types        | Featured element composition                                                                           | Mixing properties                                                                                                                                            | Sources                                                                                       | References                                                     |
|-----------------------|--------------------------------------------------------------------------------------------------------|--------------------------------------------------------------------------------------------------------------------------------------------------------------|-----------------------------------------------------------------------------------------------|----------------------------------------------------------------|
| <b>Mineral dust</b>   | Si, Al, Fe, Ca, Mg-rich, such as clay, quartz, feldspar, albite, with minor calcite, and other oxides. | Reacted minerals aggregated with soot and salt (MCS, nitrite, etc.).                                                                                         | Desert sand and crustal surface soil.                                                         | Shao et al., 2007<br>Laskin et al., 2005<br>Dong et al., 2017; |
| <b>Soot (BC)</b>      | C (dominant) and O-rich.                                                                               | C-rich materials mixed with organic, S, and K-rich particles.                                                                                                | Fossil fuels and biomass burning.                                                             | Li et al., 2014                                                |
| <b>Fly ash</b>        | Si, Al, Fe, S, and Ti-rich.                                                                            | Fly ash mixed with salt (NaCl, sulfate), metals (Fe <sub>2</sub> O <sub>3</sub> , MnO <sub>2</sub> ), silicate containing minor Fe, Mn, Ti and other metals. | Coal-fired power plants, heavy industries, and oil refinery.                                  | Shi et al., 2003<br>Li et al., 2014                            |
| <b>Organic matter</b> | C (dominant), O, Si-rich, and regular spherical organic particles.                                     | Mixed with mineral, S-rich and K-rich pollutants particles.                                                                                                  | Biological particle, fossil fuels and biomass burning.                                        | Hand et al., 2005;<br>Chakrabarty et al., 2006                 |
| <b>Sulfate</b>        | S- (dominant) rich and mixing sulfate cation (K, Ca, Na, and Mg).                                      | Mixed cation sulfate, (HN <sub>4</sub> ) <sub>2</sub> SO <sub>4</sub> , and often coated with mineral, soot, and organic particles.                          | Fossil fuels emission and secondary particles formed by SO <sub>2</sub> and NO <sub>x</sub> . | Li et al., 2014<br>Li and Shao, 2009b<br>Niemi et al., 2006;   |
| <b>Nitrite</b>        | N (dominant), O, K, and Na-rich.                                                                       | Coated and mixed with other type particles (sulfate, mineral, soot, and organic).                                                                            | Fossil fuels and secondary particles formed by NO <sub>x</sub> .                              | Niemi et al., 2006<br>Adachi and Buseck, 2008                  |
| <b>NaCl</b>           | NaCl rich salt.                                                                                        | Cubic NaCl particle, often coated by NaNO <sub>3</sub> and Na <sub>2</sub> SO <sub>4</sub> .                                                                 | Sea salt from the Indian Ocean and other seas, salt from arid dust regions.                   | Li et al., 2014<br>Vester et al., 2007                         |
| <b>Ammonium</b>       | (HN <sub>4</sub> ) <sub>2</sub> SO <sub>4</sub> and (HN <sub>4</sub> ) <sub>2</sub> NO <sub>3</sub> .  | Mixed with MCS, nitrite and minerals.                                                                                                                        | Fossil fuels and secondary particles formed NH <sub>3</sub> .                                 | Li et al., 2014                                                |
